# Supplementary material
Source: PubMed Central journal article supplement (PMC7027161)

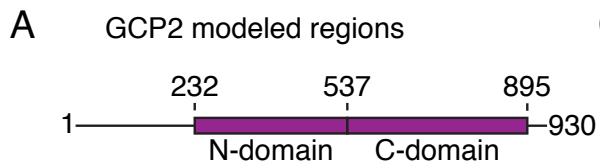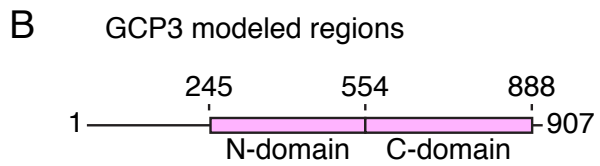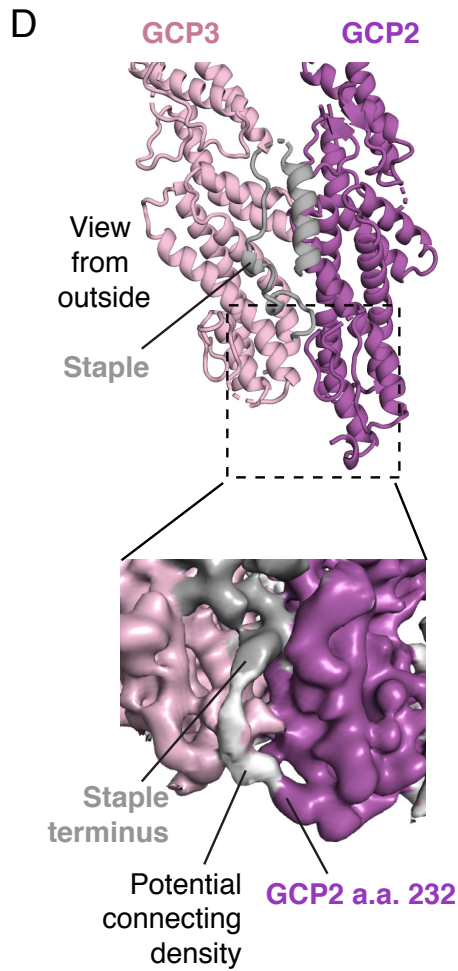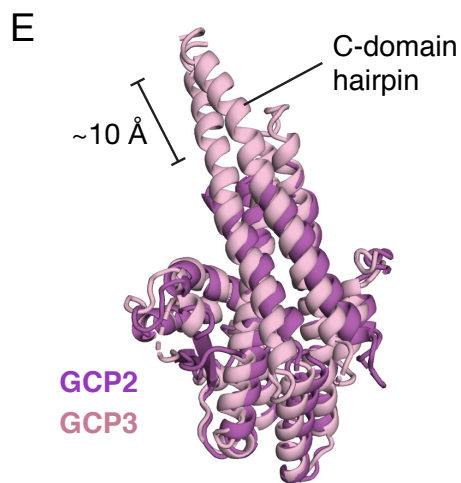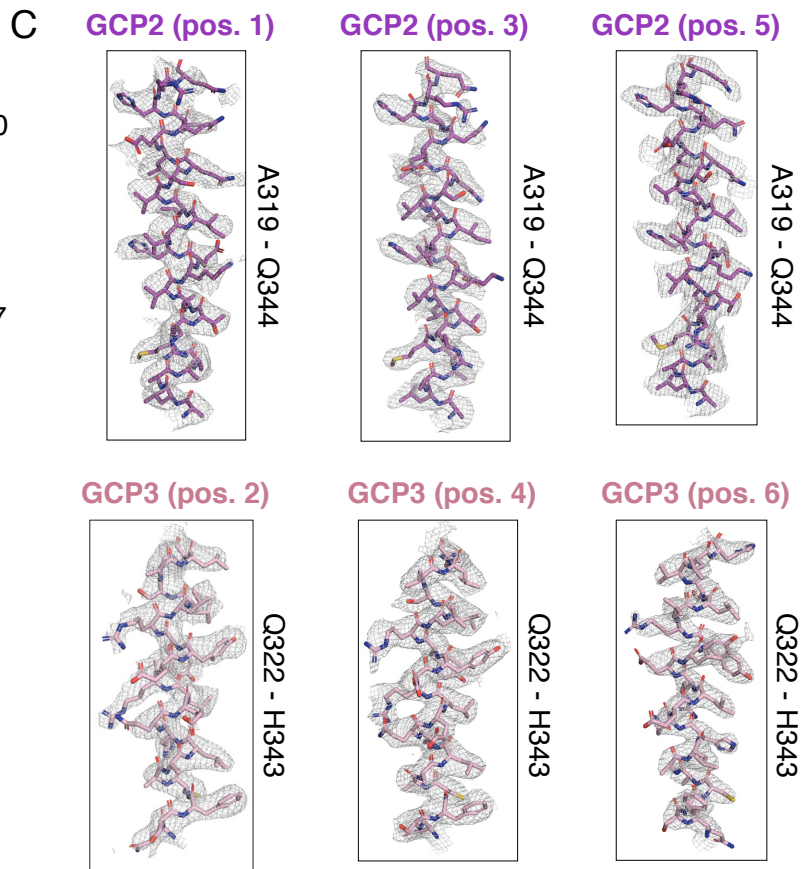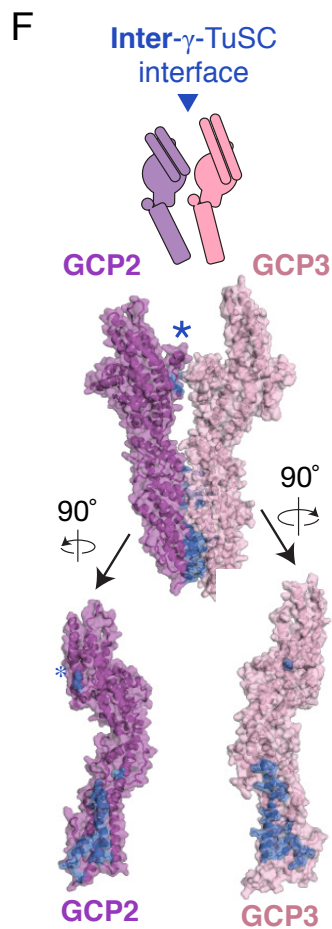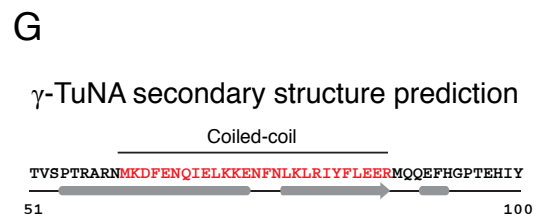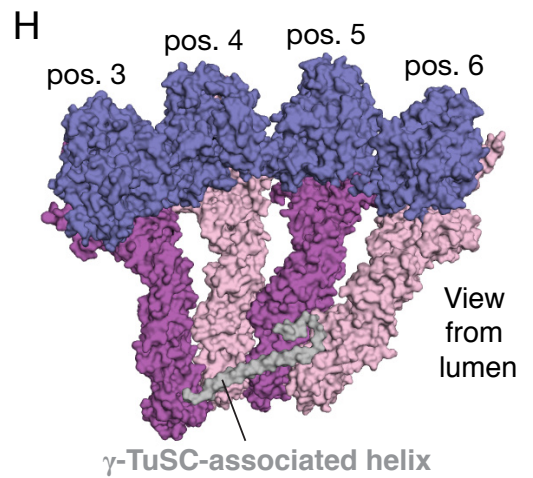

Supplement: NIHMS1546252-supplement-5.pdf [file NIHMS1546252-supplement-5.pdf]
